# Supplementary material for: Hnrnpab regulates neural cell motility through transcription of Eps8
Source: PubMed Central journal article supplement — RNA. 2019 Jan;25(1):45–59. doi: 10.1261/rna.067413.118 (PMC6298563; doi:10.1261/rna.067413.118), 2019-01
Supplement: supp_067413.118_Supplemental_Figures.pdf [file supp_067413.118_Supplemental_Figures.pdf]

## Supplemental Figure Legends

**Figure S1** Hnrnpab restores expression of Eps8p97 transcripts in INCs. A) QPCR primers specific to either Eps8p97 or Eps8p68 mRNAs were used to quantify the mRNA for each of these transcripts in Hnrnpab<sup>+/+</sup> INCs, Hnrnpab<sup>-/-</sup> INCs, or Hnrnpab<sup>-/-</sup> INCs expressing either WT-MG, and mut-MG as indicated above the chart. The results are expressed as the log<sub>2</sub> of the fold change relative to Hnrnpab<sup>+/+</sup> INCs. The data represents an average measurement from 4 independent cultures, with each measured performed duplicate. B) QPCR primers specific to Eps8p68 mRNA were used to quantify the mRNA in Hnrnpab<sup>+/+</sup> INCs, Hnrnpab<sup>-/-</sup> INCs, and Hnrnpab<sup>-/-</sup> INCs expressing V5-Eps8p97 as indicated on the chart. The results are expressed as the log<sub>2</sub> of the fold change relative to Eps8p68 expression in Hnrnpab<sup>+/+</sup> INCs. Hnrnpab<sup>+/+</sup> n=4, Hnrnpab<sup>-/-</sup> n=4, Hnrnpab<sup>-/-</sup> +V5-Eps8p97 n=3.

**Figure S2** Eps8 mRNA Stability is not altered in Hnrnpab<sup>-/-</sup> INCs. Eps8 mRNA was quantified by QPCR in Hnrnpab<sup>+/+</sup> INCs and Hnrnpab<sup>-/-</sup> INCs immediately prior to addition of Actinomycin D (ActD, t<sub>0</sub>), and at 4 and 8 hours after ActD as indicated. Eps8 mRNA in this experiment was normalized to Actb mRNA. The amount of Eps8 mRNA relative to t<sub>0</sub> was plotted to indicate the turnover of Eps8 in Hnrnpab<sup>+/+</sup> and Hnrnpab<sup>-/-</sup> INCs. Hnrnpab<sup>+/+</sup> n=2, Hnrnpab<sup>-/-</sup> n=2.

**Figure S3** Neither Hnrnpab1 nor Hnrnpab2 alone restores Eps8 mRNA levels. Eps8 mRNA was quantified by QPCR and normalized to AnapC5 control in Hnrnpab<sup>+/+</sup> INCs, Hnrnpab<sup>-/-</sup> INCs, or Hnrnpab<sup>-/-</sup> INCs expressing either WT-MG, mut-MG, Hnrnpab1 or Hnrnpab2 as indicated above the chart. The results are expressed as the log<sub>2</sub> of the fold change relative to Eps8 mRNA in

Hnrnpab<sup>+/+</sup> INCs. Hnrnpab<sup>+/+</sup> n= 14, Hnrnpab<sup>-/-</sup> n= 11, WT-MG n=10, mut-MG n=6, Hnrnpab1 n=3, Hnrnpab2 n=2.

**Figure S4** Snrnp70 and Actb control mRNA levels in QPCR are consistent between genotypes and over multiple experiments. We plotted the cycle threshold value for Snrnp70 and Actb mRNAs from multiple independent experiments among Hnrnpab<sup>+/+</sup> INCs, Hnrnpab<sup>-/-</sup> INCs, and Hnrnpab<sup>-/-</sup> INCs expressing either WT-MG, and mut-MG as indicated below the chart. The data represents several independent experiments, with each experiment representing a measurement in duplicate. The number of experiments for each measurement is as follows: Hnrnpab<sup>+/+</sup> Snrnp70 n=20, Hnrnpab<sup>-/-</sup> Snrnp70 n=20, WT-MG Snrnp70 n=17, mut-MG Snrnp70 n=10. Hnrnpab<sup>+/+</sup> Actb n=12, Hnrnpab<sup>-/-</sup> Actb n=12, WT-MG Actb n=11, mut-MG Actb n=6. Error bars represent standard error of mean.

A)

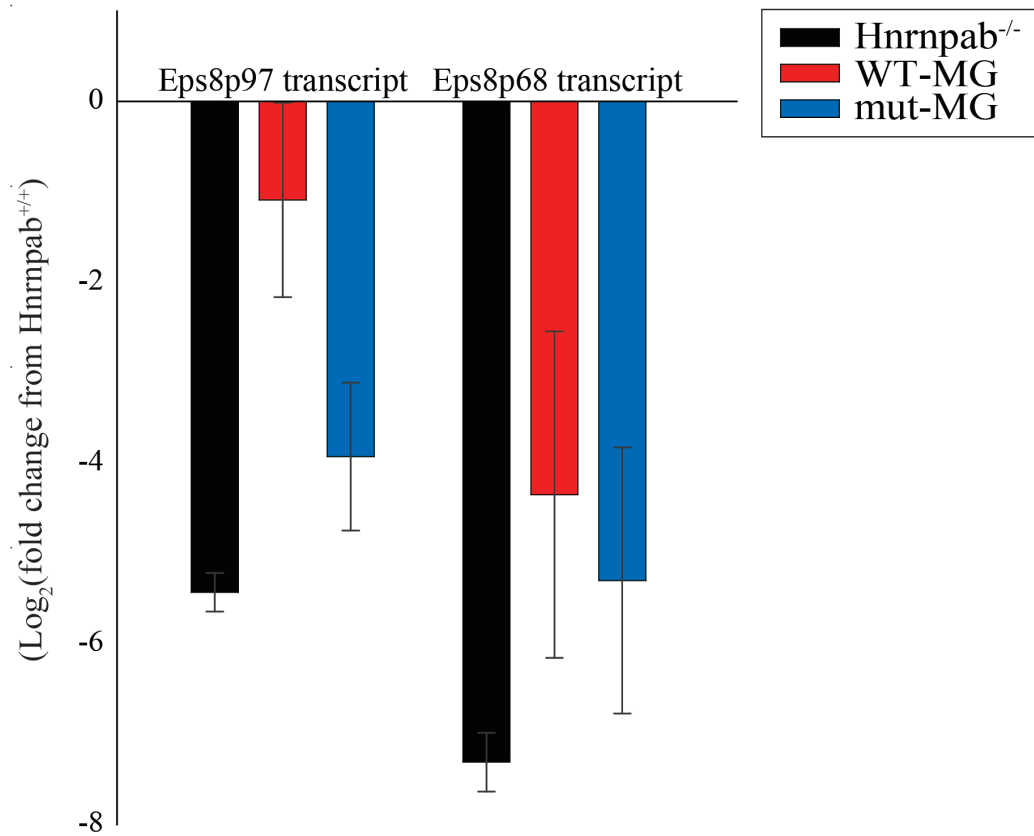

B)

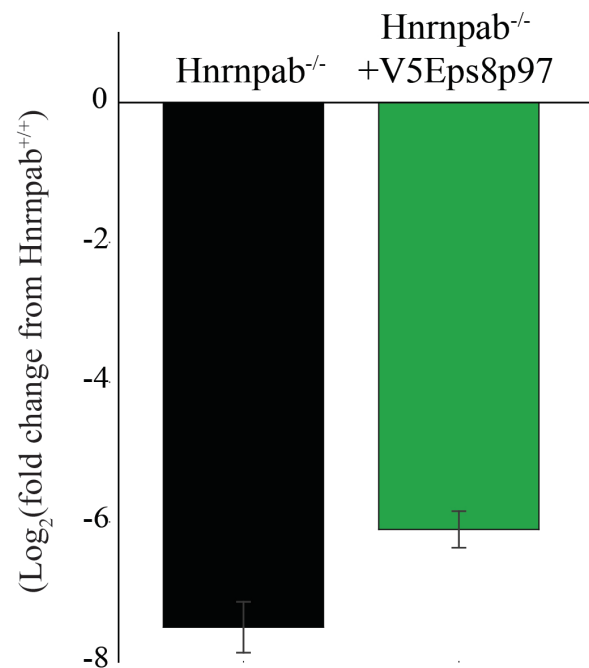

Figure S1 Hnrnpab restores expression of Eps8p97 transcripts in INCs. A) QPCR primers specific to either Eps8p97 or Eps8p68 mRNAs were used to quantify the mRNA for each of these transcripts in  $\text{Hnrnpab}^{+/+}$  INCs,  $\text{Hnrnpab}^{-/-}$  INCs, or  $\text{Hnrnpab}^{-/-}$  INCs expressing either WT-MG, and mut-MG as indicated above the chart. The results are expressed as the  $\text{log}_2$  of the fold change relative to  $\text{Hnrnpab}^{+/+}$  INCs. The data represents an average measurement from 4 independent cultures, with each measured performed duplicate. B) QPCR primers specific to Eps8p68 mRNA were used to quantify the mRNA in  $\text{Hnrnpab}^{+/+}$  INCs,  $\text{Hnrnpab}^{-/-}$  INCs, and  $\text{Hnrnpab}^{-/-}$  INCs expressing V5-Eps8p97 as indicated on the chart. The results are expressed as the  $\text{log}_2$  of the fold change relative to Eps8p68 expression in  $\text{Hnrnpab}^{+/+}$  INCs.  $\text{Hnrnpab}^{+/+}$  n=4;  $\text{Hnrnpab}^{-/-}$  n=4;  $\text{Hnrnpab}^{-/-}$  +V5-Eps8p97 n=3.

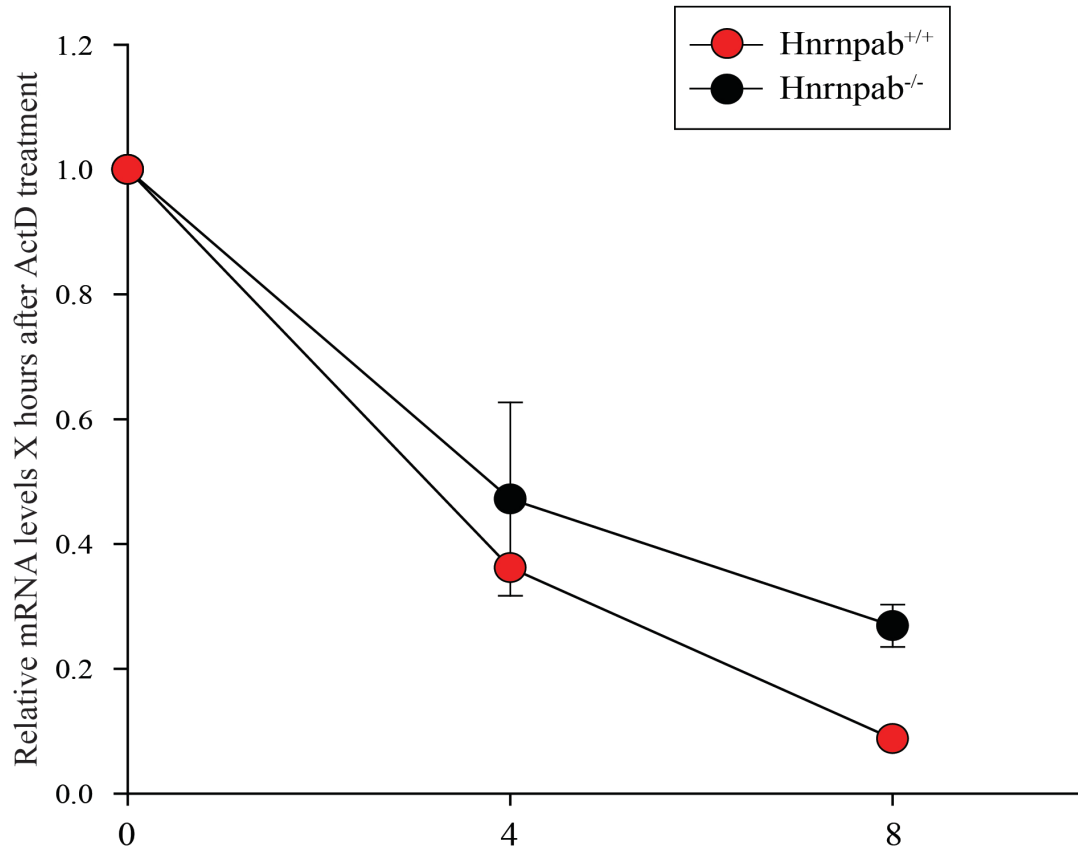

Figure S2 Eps8 mRNA stability is not altered in Hnrnpab<sup>-/-</sup> INCs. Eps8 mRNA was quantified by QPCR in Hnrnpab<sup>+/+</sup> INCs and Hnrnpab<sup>-/-</sup> INCs immediately prior to addition of Actinomycin D (ActD, t<sub>0</sub>), and at 4 and 8 hours after ActD as indicated. Eps8 mRNA in this experiment was normalized to Actb mRNA. The amount of Eps8 mRNA relative to t<sub>0</sub> was plotted to indicate the turnover of Eps8 in Hnrnpab<sup>+/+</sup> and Hnrnpab<sup>-/-</sup> INCs. Hnrnpab<sup>+/+</sup> n=2; Hnrnpab<sup>-/-</sup> n=2.

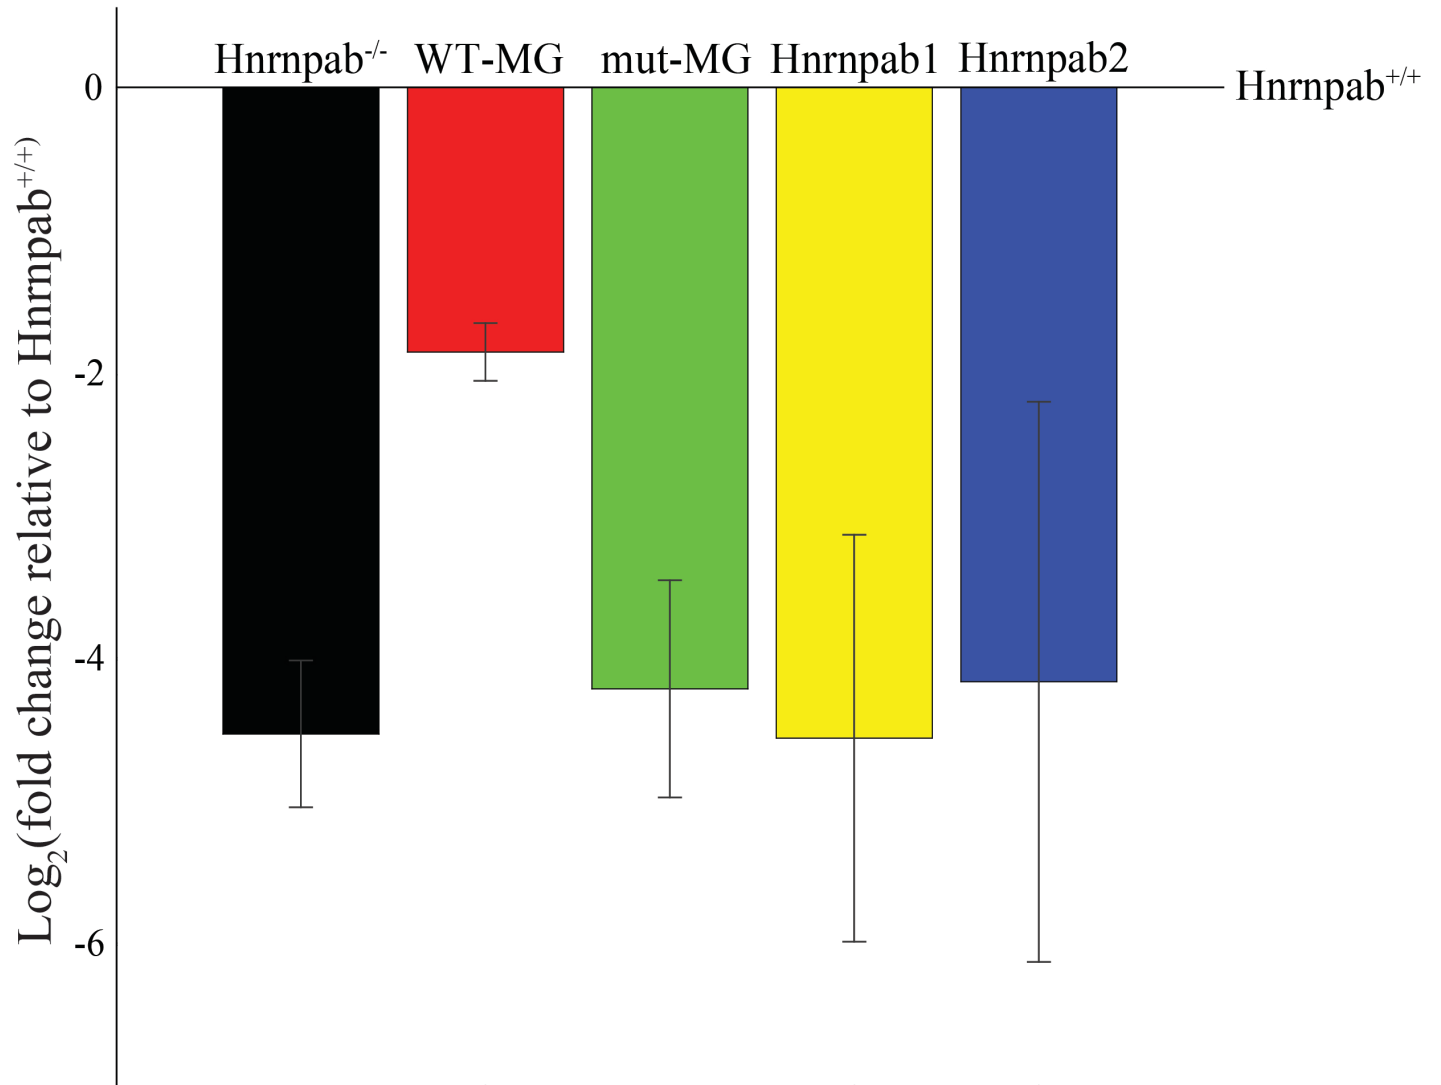

Figure S3 Neither Hnrnpab1 nor Hnrnpab2 alone restores Eps8 mRNA levels. Eps8 mRNA was quantified by QPCR and normalized to AnapC5 control in Hnrnpab<sup>+/+</sup> INCs, Hnrnpab<sup>-/-</sup> INCs, or Hnrnpab<sup>-/-</sup> INCs expressing either WT-MG, mut-MG, Hnrnpab1 or Hnrnpab2 as indicated above the chart. The results are expressed as the log<sub>2</sub> of the fold change relative to Eps8 mRNA in Hnrnpab<sup>+/+</sup> INCs. Hnrnpab<sup>+/+</sup> n= 14; Hnrnpab<sup>-/-</sup> n= 11; WT-MG n=10; mut-MG n=6; Hnrnpab1 n=3; Hnrnpab2 n=2.

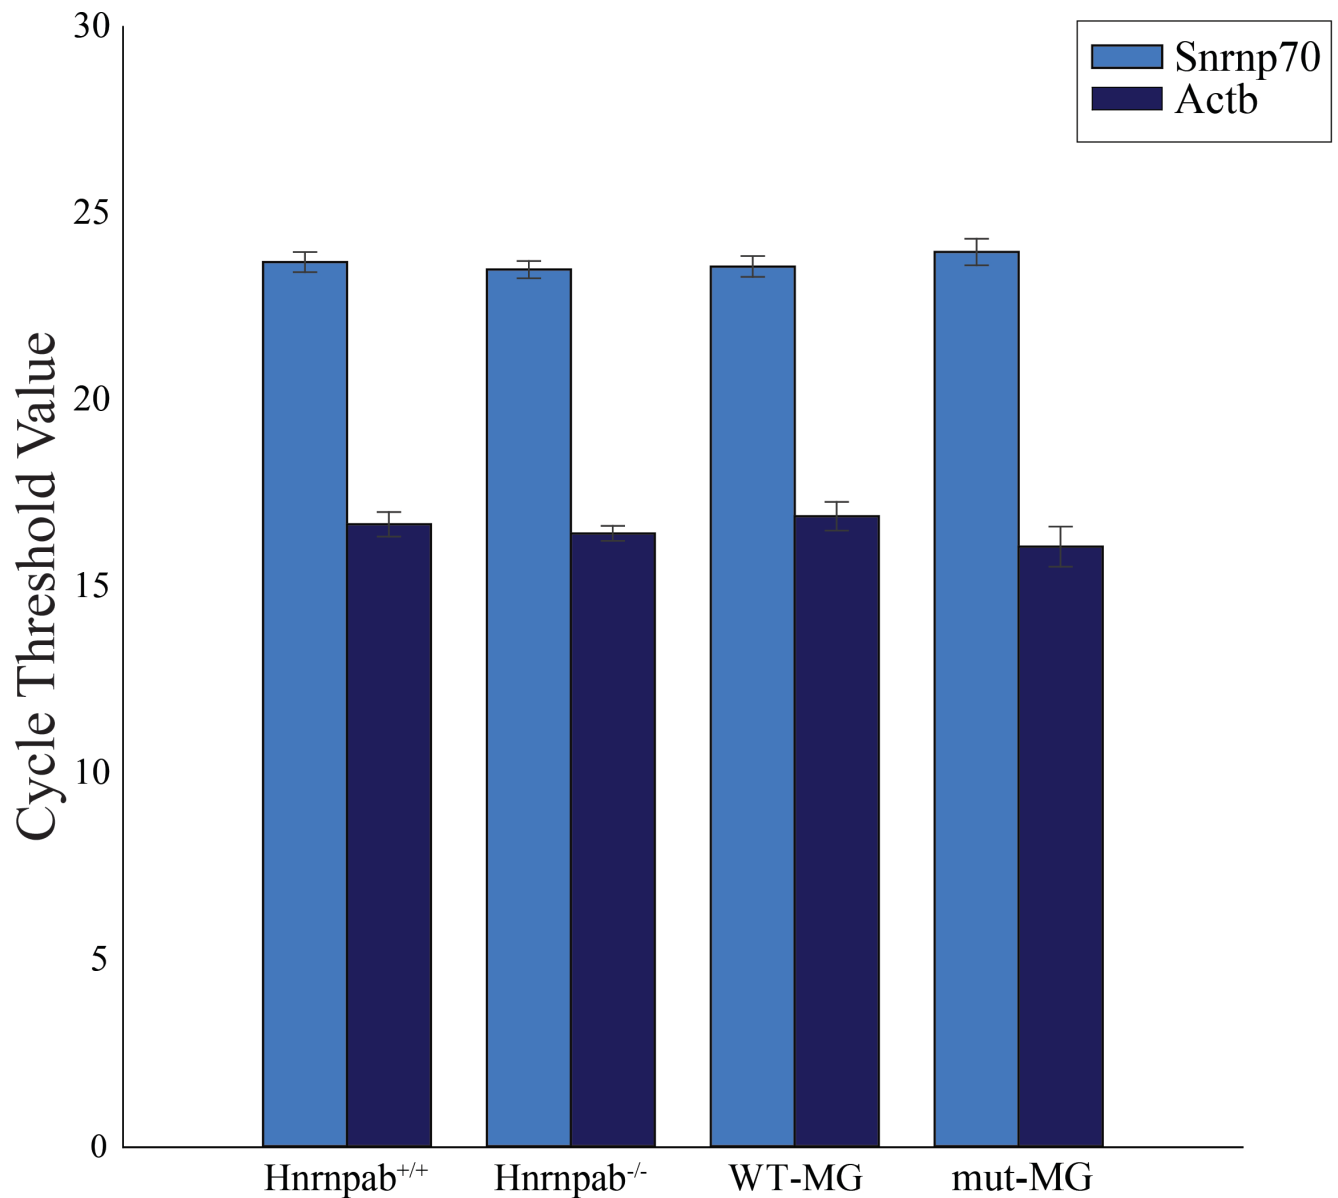

Figure S4 Snrnp70 and Actb control mRNA levels in QPCR are consistent between genotypes and over multiple experiments. We plotted the cycle threshold value for Snrnp70 and Actb mRNAs from multiple independent experiments among Hnrnpab<sup>+/+</sup> INCs, Hnrnpab<sup>-/-</sup> INCs, and Hnrnpab<sup>-/-</sup> INCs expressing either WT-MG, and mut-MG as indicated below the chart. The data represents several independent experiments, with each experiment representing a measurement in duplicate. The number of experiments for each measurement is as follows: Hnrnpab<sup>+/+</sup> Snrnp70 n=20; Hnrnpab<sup>-/-</sup> Snrnp70 n=20; WT-MG Snrnp70 n=17; mut-MG Snrnp70 n=10. Hnrnpab<sup>+/+</sup> Actb n=12; Hnrnpab<sup>-/-</sup> Actb n=12; WT-MG Actb n=11; mut-MG Actb n=6. Error bars represent standard error of mean.
