# Supplementary material for: Hnrnpab regulates neural cell motility through transcription of Eps8
Source: PubMed Central journal article supplement — RNA. 2019 Jan;25(1):45–59. doi: 10.1261/rna.067413.118 (PMC6298563; doi:10.1261/rna.067413.118), 2019-01
Supplement: supp_067413.118_Supplemental_Tables.pdf [file supp_067413.118_Supplemental_Tables.pdf]

## Supplemental Table legends

**Supplemental Table SI** - Genes differentially expressed between *Hnrnpab*<sup>+/+</sup> and *Hnrnpab*<sup>-/-</sup> INCs. RNA from three independent isolates of *Hnrnpab*<sup>+/+</sup> and *Hnrnpab*<sup>-/-</sup> INCs were sent to the New York Genome Center for sequencing. The genes whose changes were consistent between two independent differential gene analyses of this data are indicated by gene name. The DESeq2 entries for the differential expression of these genes is listed here. Genes analyzed further in Tables SII and SIII are indicated in green and yellow, respectively.

**Supplemental Table SII** - Cell motility genes from Table SI were selected for RT-QPCR screening and are indicated by gene name. We quantified mRNA levels of the indicated genes using RT-QPCR in *Hnrnpab*<sup>+/+</sup> and *Hnrnpab*<sup>-/-</sup> INCs. The results are expressed as the log<sub>2</sub> of the fold change relative to the mRNA expression *Hnrnpab*<sup>+/+</sup> INCs. The data represents several independent experiments, with each experiment representing a measurement in duplicate. The number of experiments is the same for each gene between *Hnrnpab*<sup>+/+</sup> and *Hnrnpab*<sup>-/-</sup> and are as follows: *Eps8* n=12; *Eps8l2* n=4; *Rnd1* n=4; *Unc5b* n=3; *Parvb* n=2; *Sema7a* n=2; *Sema3a* n=2; *Tns1* n=3. Consistency with the RNA-seq analysis and whether or not the change was corrected by the restoration of *Hnrnpab* WT is indicated.

**Supplemental Table SIII** - Transcription factor genes from Table SI were selected for RT-QPCR screening and are indicated by gene name. We quantified mRNA levels of the indicated genes using RT-QPCR in *Hnrnpab*<sup>+/+</sup> and *Hnrnpab*<sup>-/-</sup> INCs. The results are expressed as the log<sub>2</sub> of the fold change relative to the mRNA expression *Hnrnpab*<sup>+/+</sup> INCs. The number of experiments is the same for each gene between *Hnrnpab*<sup>+/+</sup> and *Hnrnpab*<sup>-/-</sup> and are as follows:

En1 n=4; Zic1 n=3; Eomes n=2; Irx1 n=1; Irx2 n=1; Zfp52 n=1; Foxf2 n=1; Six2 n=1.

Consistency with the RNA-seq analysis and whether or not the change was corrected by the restoration of Hnrnpab WT is indicated.

**Supplemental Table SIV** Primers used for RT-QPCR. All primers were first verified by RT-PCR to look for the presence of a single band. Melting curves were generated for all primer sets to confirm a single amplicon.

**Supplemental Table SV** Probes used for Intron FISH are listed 5' to 3'.

| Cell Motility Gene | Log2(fold change) DESeq2 | Log2(fold change) RT-QPCR | Detectable by RT-QPCR in both Hnrnpab <sup>+/+</sup> and Hnrnpab <sup>-/-</sup> INCs? | RT-QPCR >2-fold changed? | RNAseq and RT-QPCR in agreement? | Rescued in WT-MG? |
|--------------------|--------------------------|---------------------------|---------------------------------------------------------------------------------------|--------------------------|----------------------------------|-------------------|
| <b>Eps8</b>        | <b>-1.5087743</b>        | <b>-5.7590</b>            | <b>Yes</b>                                                                            | <b>Yes</b>               | <b>Yes</b>                       | <b>Yes</b>        |
| Rnd1               | -0.889                   | -2.00125                  | Yes                                                                                   | Yes                      | Yes                              | No                |
| Tns1               | 1.06808                  | 2.0667                    | Yes                                                                                   | Yes                      | Yes                              | No                |
| Unbc5b             | -1.1055941               | -0.65                     | Yes                                                                                   | No                       | N/A                              | N/A               |
| Sema3a             | -1.8828949               | 0.905                     | Yes                                                                                   | No                       | N/A                              | N/A               |
| Sema7a             | -1.5180376               | 0.36                      | Yes                                                                                   | No                       | N/A                              | N/A               |
| Parvb              | -1.1039353               | 0.0225                    | Yes                                                                                   | No                       | N/A                              | N/A               |
| Eps8l2             | -2.0419489               | -2.35                     | No                                                                                    | N/A                      | N/A                              | N/A               |

Supplemental Table S2.

| Transcription Factor | Log <sub>2</sub> (fold change) DESeq2 | Log <sub>2</sub> (fold change) RT-QPCR | RNAseq and RT-QPCR in agreement? | Rescued in WT-MG? |
|----------------------|---------------------------------------|----------------------------------------|----------------------------------|-------------------|
| En1                  | -2.635                                | -3.801                                 | Yes                              | No                |
| Zic1                 | -2.430                                | -2.600                                 | Yes                              | No                |
| Zfp52                | -0.894                                | 1.455                                  | No                               | N/A               |
| Six2                 | -1.612                                | 0.930                                  | No                               | N/A               |
| Irx1                 | 2.405                                 | -0.310                                 | No                               | N/A               |
| Irx2                 | 2.944                                 | -4.230                                 | No                               | N/A               |
| Eomes                | -2.052                                | 0.025                                  | No                               | N/A               |
| Foxf2                | -1.754                                | 0.520                                  | No                               | N/A               |

Supplemental Table 3.

**Table SIV Primers used for RT-QPCR**

| Name of Gene      | Forward Primer           | Reverse Primer           |
|-------------------|--------------------------|--------------------------|
| Eps8              | CAACTCCTAATCACCAAGTAGATA | CTTCGATCGTCGAGTATCTCT    |
| Snrnp70           | CCGCGCGATTGGCAAGA        | CTTGTTGGAGGAGGAGCATCT    |
| Actb              | AGTGTGACGTTGACATCCGT     | TGCTAGGAGCCAGAGCAGTA     |
| Eps8 intron 2     | GAGGACAGGCTGGTAGAGAAGAA  | TAGCTTCAGTACAATTACTGGGC  |
| Eps8 intron 20/21 | GAGCAGCTCCATTCCACAAGT    | TCCCTCACAGTAATTTATTTCTTG |
| Eps8 transcript 1 | GCGGATCCTAGGCTGTCTATA    | TCTCACGCCTCTGTTCTCAG     |
| Eps8 transcript 5 | CGTGCCAGTCGAGAAG         | GTTTAAGATTTGCACATCCCTGT  |
| Eps8l2            | GAGAAACAACAAAGTGGGTCA    | GGGTTGGGCCATTACA         |
| Sema3a            | GATATCCTGAAAGAATGTGCC    | ATGTTGTCTCAGGATGATG      |
| Sema7a            | CAGTCATGCAGAACCCACAGT    | CCTGCACAACCTGGGCTACT     |
| Unc5B             | CTGAATCAGAGAACTCTAAACGAC | CGGTATACGATCACTCCCAC     |
| Parvb             | TCCAGCCCACAGAGCAATTA     | GACCCTTGCTTCCAAGGAGA     |
| Zic1              | CAGTATCCCGCGATTGGTGT     | GCGAACTGGGGTTGAGCTT      |
| Tbr2/Eomes        | GCGCATGTTTCTTTCTTGAG     | GGTCGGCCAGAACCACTTC      |
| Tns1              | GCTGGCTCTTACCATTGCC      | GGGTGCAGCAAGATGTCTG      |
| En1               | CTAAGGCCCGATTTTCGGTTG    | GAGTGAACGGGGTCTCTACCT    |
| Zfp52             | AACTTACCTATAACCGCAGGGC   | ATTGTGGTCTGGATCCTTAGGT   |
| Irx1              | TCCGGGATCCCCGTATTGA      | CTTCTCGCAGATGGGCTCTC     |
| Irx2              | CCCCAAGGAACAAAAGCGA      | TGTAGACTGATCCCTTCGTCC    |
| Foxf2             | GCGAGGATCTCTCAGTCGGA     | GCGGAAGGGTGGAAAGAAGAA    |
| Six2              | CTACATCGAGGCGGAGAAGC     | GTAGGGGTTGTGAGCGTACC     |

**Table SV.** Sequences for intron fluorescence *in situ* hybridization

| Gene          | Probe Number | Probe sequence        | Dye        |
|---------------|--------------|-----------------------|------------|
| Eps8 intron 2 | 1            | gatcatgaaggtaggagggg  | Quasar 570 |
| Eps8 intron 2 | 2            | ccatcaacatcaacacttcc  | Quasar 570 |
| Eps8 intron 2 | 3            | gactggcagatgtcacagaa  | Quasar 570 |
| Eps8 intron 2 | 4            | ctctgagcttgtggaaata   | Quasar 570 |
| Eps8 intron 2 | 5            | agggcacctctgtagataatc | Quasar 570 |
| Eps8 intron 2 | 6            | ggcagttactaatgaggagc  | Quasar 570 |
| Eps8 intron 2 | 7            | aggtaagtggggaaatgtcc  | Quasar 570 |
| Eps8 intron 2 | 8            | ttcacaatgtaaccccttg   | Quasar 570 |
| Eps8 intron 2 | 9            | tgtgaatttctccatgctga  | Quasar 570 |
| Eps8 intron 2 | 10           | acctgacttctttcattctg  | Quasar 570 |
| Eps8 intron 2 | 11           | acctataggtgatagtcc    | Quasar 570 |
| Eps8 intron 2 | 12           | tgaggcatccagatgaatgg  | Quasar 570 |
| Eps8 intron 2 | 13           | aggagcagcaacaggagtaa  | Quasar 570 |
| Eps8 intron 2 | 14           | ctaagagagcgaggaagcgt  | Quasar 570 |
| Eps8 intron 2 | 15           | ggaatgcaaagcctcaggaa  | Quasar 570 |
| Eps8 intron 2 | 16           | agtcacacaaccattagac   | Quasar 570 |
| Eps8 intron 2 | 17           | atgacattttgtccagacc   | Quasar 570 |
| Eps8 intron 2 | 18           | gctaagagaggaaccaggta  | Quasar 570 |
| Eps8 intron 2 | 19           | acagggtcaatgggcaaaga  | Quasar 570 |
| Eps8 intron 2 | 20           | aatttagcagatgagccagc  | Quasar 570 |
| Eps8 intron 2 | 21           | ttttggggtgacggaacac   | Quasar 570 |
| Eps8 intron 2 | 22           | gcaatgtctggaggacttta  | Quasar 570 |
| Eps8 intron 2 | 23           | taagctcacaccagaagggt  | Quasar 570 |
| Eps8 intron 2 | 24           | cttacagctatgactgcaca  | Quasar 570 |
| Eps8 intron 2 | 25           | ctccacacatctcctaaac   | Quasar 570 |
| Eps8 intron 2 | 26           | ttggagcaaaccacttgaa   | Quasar 570 |
| Eps8 intron 2 | 27           | cctacagtactaacaggtct  | Quasar 570 |
| Eps8 intron 2 | 28           | ctcatttctctgaagaggca  | Quasar 570 |
| Eps8 intron 2 | 29           | cccaacatgatccacaaaca  | Quasar 570 |
| Eps8 intron 2 | 30           | tcaagctgtgtacctcatag  | Quasar 570 |
| Eps8 intron 2 | 31           | gaactcgcgagctaagcaag  | Quasar 570 |
| Eps8 intron 2 | 32           | gcagtgaagttttatctggc  | Quasar 570 |
| Eps8 intron 2 | 33           | ccagcctttttacagattta  | Quasar 570 |
| Eps8 intron 2 | 34           | gcagtatgtcctatttactc  | Quasar 570 |
| Eps8 intron 2 | 35           | gaatccacttcatgtcttca  | Quasar 570 |
| Eps8 intron 2 | 36           | aatcatattcccagcttagg  | Quasar 570 |
| Eps8 intron 2 | 37           | ttacaatcagacgggtgctg  | Quasar 570 |
| Eps8 intron 2 | 38           | tgaacttctccgagacggaa  | Quasar 570 |

|                  |    |                       |            |
|------------------|----|-----------------------|------------|
| Eps8 intron 2    | 39 | cagtttatagtagcaccaca  | Quasar 570 |
| Eps8 intron 2    | 40 | tctcactctgtccttctaaa  | Quasar 570 |
| Eps8 intron 2    | 41 | ttgctggacactaattcca   | Quasar 570 |
| Eps8 intron 2    | 42 | acactcctctatcatttctg  | Quasar 570 |
| Eps8 intron 2    | 43 | ggttggtgacacataggaag  | Quasar 570 |
| Eps8 intron 2    | 44 | ttgagagaggctttgctaga  | Quasar 570 |
| Eps8 intron 2    | 45 | tctgctgcagaagtgatgta  | Quasar 570 |
| Eps8 intron 2    | 46 | acgacaactcacactgggag  | Quasar 570 |
| Eps8 intron 2    | 47 | tgetgagtacacactgatc   | Quasar 570 |
| Eps8 intron 2    | 48 | tggtgtacggaaagagggtt  | Quasar 570 |
| Actb introns 1-2 | 1  | aggtagtagccacgagagag  | Quasar 670 |
| Actb introns 1-2 | 2  | ttctgagtgatcctcaggac  | Quasar 670 |
| Actb introns 1-2 | 3  | aaagttggctgtgccagtgt  | Quasar 670 |
| Actb introns 1-2 | 4  | aaagagtctacacgctagggc | Quasar 670 |
| Actb introns 1-2 | 5  | aatacggcttttaacacccg  | Quasar 670 |
| Actb introns 1-2 | 6  | ctgtgtactctcaagatgga  | Quasar 670 |
| Actb introns 1-2 | 7  | gtgatcgtagcgtctgggtc  | Quasar 670 |
| Actb introns 1-2 | 8  | ttggacaaagaccagagggc  | Quasar 670 |
| Actb introns 1-2 | 9  | caagccgaataggcaaaccg  | Quasar 670 |
| Actb introns 1-2 | 10 | cgatgccagtgatagagag   | Quasar 670 |
| Actb introns 1-2 | 11 | aatacgcacgcgcagctaac  | Quasar 670 |
| Actb introns 1-2 | 12 | agcaggaagcgcaacaagg   | Quasar 670 |
| Actb introns 1-2 | 13 | ggccgcattattaccataaa  | Quasar 670 |
| Actb introns 1-2 | 14 | caagctcaggggacaagga   | Quasar 670 |
| Actb introns 1-2 | 15 | aagaaggctatagtcacctc  | Quasar 670 |
| Actb introns 1-2 | 16 | cttgccactcccaaagtaac  | Quasar 670 |
| Actb introns 1-2 | 17 | gcatcgatcccaagaaaac   | Quasar 670 |
| Actb introns 1-2 | 18 | gaagggaaacagccttcttag | Quasar 670 |
| Actb introns 1-2 | 19 | caaagagaagggttaccggg  | Quasar 670 |
| Actb introns 1-2 | 20 | atgggagaacggcagaagaa  | Quasar 670 |
| Actb introns 1-2 | 21 | tcagctcatagaaggagtc   | Quasar 670 |
| Actb introns 1-2 | 22 | actgcaaagatccaaggag   | Quasar 670 |
| Actb introns 1-2 | 23 | cctcgtctgggaaagagcag  | Quasar 670 |
| Actb introns 1-2 | 24 | aaacacctagtcagaaaggc  | Quasar 670 |
| Actb introns 1-2 | 25 | taaaccacagcactgtagg   | Quasar 670 |
| Actb introns 1-2 | 26 | cacacgagccattgtagta   | Quasar 670 |
| Actb introns 1-2 | 27 | cttatcaccagcctcattag  | Quasar 670 |
| Actb introns 1-2 | 28 | ctcaatacacactccaaggc  | Quasar 670 |
| Actb introns 1-2 | 29 | acttagacctactgtgcatc  | Quasar 670 |
| Actb introns 1-2 | 30 | taagttcagtgtgctgggag  | Quasar 670 |
| Actb introns 1-2 | 31 | gcaaggagtgaagaacaca   | Quasar 670 |

|                  |    |                      |            |
|------------------|----|----------------------|------------|
| Actb introns 1-2 | 32 | ctgtatggatagatctgaga | Quasar 670 |
| Actb introns 1-2 | 33 | aagaaacactcagggcaggt | Quasar 670 |
| Actb introns 1-2 | 34 | gttgcaagtcagaaagcc   | Quasar 670 |
